# Supplementary material for: Exploring the effects of axial halogen substitutions of boron subphthalocyanines on the performance of BsubPC/C60 organic solar cells: a DFT/TDDFT-based computational study
Source: Royal Society of Chemistry journal article supplement (doi:10.1039/c9nj02180a), 2019-01-01
Supplement: c9nj02180a1.pdf [file c9nj02180a1.pdf]

Exploring the effects of axial halogen substitutions of boron  
subphthalocyanines on their performance in BsubPC/C60 organic solar  
cells: A DFT/TDDFT-based computational study

Guo Li and Shaohui Zheng\*  
Faculty of Materials and Energy  
Southwest University, Chongqing, China  
Corresponding author: shaohuizheng@swu.edu.cn  
New Journal of Chemistry

Table S1. The binding energies of X-BsubPC/C60 bi-molecular systems obtained with PCM and the BSSE corrections in gas phase. Unit: kJ/mol

| System | With BSSE | BSSE  | Without BSSE |
|--------|-----------|-------|--------------|
| F(B)   | 31.31     | 15.82 | 47.13        |
| Cl(B)  | 33.09     | 11.96 | 45.04        |
| Br(B)  | 33.14     | 23.88 | 57.03        |
| F(U)   | 75.21     | 28.42 | 103.63       |
| Cl(U)  | 75.40     | 27.56 | 102.96       |
| Br(U)  | 75.50     | 27.42 | 102.92       |

Table S2. The binding energies of X-BsubPC/60 bi-molecular systems in gas phase or with PCM, U=Umbrella, B=Bed.

| BsubPC | B3LYP+GD3/6-31g**/Gas Phase |              |                |                         | B3LYP+GD3/6-31g**/Condensed Phase |              |                |                         |
|--------|-----------------------------|--------------|----------------|-------------------------|-----------------------------------|--------------|----------------|-------------------------|
|        | E(BsubPC) (a.u)             | E(C60) (a.u) | E(Dimer) (a.u) | Binding Energy (kJ/mol) | E(BsubPC) (a.u)                   | E(C60) (a.u) | E(Dimer) (a.u) | Binding Energy (kJ/mol) |
| F(B)   | -1375.22                    | -2286.29     | -3661.53       | -49.39                  | -1375.23                          | -2286.29     | -3661.53       | -47.13                  |
| Cl(B)  | -1735.57                    | -2286.29     | -4021.87       | -47.80                  | -1735.57                          | -2286.29     | -4021.88       | -45.04                  |
| Br(B)  | -3847.07                    | -2286.29     | -6133.38       | -59.98                  | -3847.08                          | -2286.29     | -6133.39       | -57.03                  |
| F(U)   | -1375.22                    | -2286.29     | -3661.55       | -104.82                 | -1375.23                          | -2286.29     | -3661.55       | -103.63                 |
| Cl(U)  | -1735.57                    | -2286.29     | -4021.89       | -104.97                 | -1735.57                          | -2286.29     | -4021.90       | -102.96                 |
| Br(U)  | -3847.07                    | -2286.29     | -6133.40       | -104.74                 | -3847.08                          | -2286.29     | -6133.40       | -102.92                 |

Table S3. The dipole moment, Mulliken charge and B-X bond length of X-BsubPC monomers and shortest distance between X atom and C60 in bed configurations with B3LYP+GD3/6-31G\*/PCM. Unit: Debye for dipole moment, Å for length and distance.

|           | Dipole Moment | Mulliken Charges<br>of X Atom | B-X Bond Length | Shortest Distance<br>between X and C60 |
|-----------|---------------|-------------------------------|-----------------|----------------------------------------|
| F-BsubPC  | 4.2243        | -0.2774                       | 1.39            | 3.16                                   |
| Cl-BsubPC | 5.8717        | -0.2726                       | 1.89            | 3.70                                   |
| Br-BsubPC | 6.0881        | -0.3482                       | 2.06            | 3.62                                   |

Table S4. The HOMO, LUMO, and gap energies of X-BsubPC/C60 configurations corrected with Equation 3-4, U=Umbrella, B=Bed.

|                  | $\omega$ B97XD |          |         | LC- $\omega$ PBE |          |         | CAM-B3LYP |          |         |
|------------------|----------------|----------|---------|------------------|----------|---------|-----------|----------|---------|
|                  | HOMO(eV)       | LUMO(eV) | Gap(eV) | HOMO(eV)         | LUMO(eV) | Gap(eV) | HOMO(eV)  | LUMO(eV) | Gap(eV) |
| F-BsubPC/C60(U)  | -5.88          | -2.61    | 3.27    | -6.25            | -2.50    | 3.75    | -5.31     | -3.05    | 2.26    |
| Cl-BsubPC/C60(U) | -5.97          | -2.65    | 3.32    | -6.35            | -2.55    | 3.80    | -5.41     | -3.09    | 2.31    |
| Br-BsubPC/C60(U) | -6.00          | -2.66    | 3.34    | -6.37            | -2.56    | 3.81    | -5.43     | -3.10    | 2.33    |
| F-BsubPC/C60(B)  | -5.85          | -2.50    | 3.35    | -6.22            | -2.40    | 3.82    | -5.29     | -2.94    | 2.35    |
| Cl-BsubPC/C60(B) | -5.94          | -2.53    | 3.42    | -6.32            | -2.43    | 3.89    | -5.38     | -2.96    | 2.42    |
| Br-BsubPC/C60(B) | -5.97          | -2.51    | 3.46    | -6.35            | -2.42    | 3.93    | -5.41     | -2.95    | 2.46    |

Table S5. The HOMO, LUMO, and gap energies of X-BsubPC/C60 configuration in gas phase, U=Umbrella, B=Bed.

|                  | $\omega$ B97XD |          |         | LC- $\omega$ PBE |          |         | CAM-B3LYP |          |         |
|------------------|----------------|----------|---------|------------------|----------|---------|-----------|----------|---------|
|                  | HOMO(eV)       | LUMO(eV) | Gap(eV) | HOMO(eV)         | LUMO(eV) | Gap(eV) | HOMO(eV)  | LUMO(eV) | Gap(eV) |
| F-BsubPC/C60(U)  | -6.73          | -1.76    | 4.97    | -7.1             | -1.65    | 5.45    | -6.17     | -2.20    | 3.97    |
| Cl-BsubPC/C60(U) | -6.81          | -1.80    | 5.01    | -7.19            | -1.7     | 5.49    | -6.26     | -2.25    | 4.01    |
| Br-BsubPC/C60(U) | -6.83          | -1.81    | 5.02    | -7.21            | -1.71    | 5.50    | -6.27     | -2.25    | 4.02    |
| F-BsubPC/C60(B)  | -6.70          | -1.65    | 5.05    | -7.07            | -1.56    | 5.51    | -6.14     | -2.09    | 4.05    |
| Cl-BsubPC/C60(B) | -6.79          | -1.69    | 5.10    | -7.16            | -1.59    | 5.57    | -6.23     | -2.12    | 4.11    |
| Br-BsubPC/C60(B) | -6.81          | -1.67    | 5.14    | -7.19            | -1.57    | 5.62    | -6.25     | -2.11    | 4.14    |

Table S6. The CT state energies of X-BsubPC/C60 bi-molecular systems. Unit: eV.

|                  | Gas Phase      |                  |           | Condensed Phase |                  |           |
|------------------|----------------|------------------|-----------|-----------------|------------------|-----------|
|                  | $\omega$ B97XD | LC- $\omega$ PBE | CAM-BL3YP | $\omega$ B97XD  | LC- $\omega$ PBE | CAM-BL3YP |
| F-BsubPC/C60(U)  | 2.65           | 3.05             | 2.45      | 2.65            | 3.05             | 2.45      |
| Cl-BsubPC/C60(U) | 2.70           | 3.12             | 2.46      | 2.70            | 3.12             | 2.46      |
| Br-BsubPC/C60(U) | 2.70           | 3.13             | 2.54      | 2.71            | 3.46             | 2.55      |
| F-BsubPC/C60(B)  | 3.19           | 3.62             | 2.51      | 3.19            | 3.62             | 2.52      |
| Cl-BsubPC/C60(B) | 3.29           | 3.71             | 2.54      | 3.31            | 3.73             | 2.54      |
| Br-BsubPC/C60(B) | 3.32           | 3.73             | 2.53      | 3.34            | 3.73             | 2.53      |

Table S7. The Vocs of X-BsubPC/C60 configurations calculated in gas phase and experiment. Unit: eV for energy; V for Voc.

| Configurations          |      | F-U                                       | Cl-U  | Br-U  | F-B   | Cl-B  | Br-B  |
|-------------------------|------|-------------------------------------------|-------|-------|-------|-------|-------|
| $\omega$ B97XD          | HOMO | -6.73                                     | -6.81 | -6.83 | -6.70 | -6.79 | -6.81 |
|                         | LUMO | -1.76                                     | -1.80 | -1.81 | -1.65 | -1.69 | -1.67 |
|                         | 1/R  | 3.29                                      | 3.26  | 3.27  | 2.56  | 2.46  | 2.46  |
|                         | Voc  | 1.68                                      | 1.74  | 1.75  | 2.49  | 2.64  | 2.67  |
| LC- $\omega$ PBE        | HOMO | -7.10                                     | -7.19 | -7.21 | -7.07 | -7.16 | -7.19 |
|                         | LUMO | -1.65                                     | -1.70 | -1.71 | -1.56 | -1.59 | -1.57 |
|                         | 1/R  | 3.29                                      | 3.26  | 3.27  | 2.56  | 2.46  | 2.46  |
|                         | Voc  | 2.16                                      | 2.22  | 2.23  | 2.96  | 3.12  | 3.15  |
| CAM-B3LYP               | HOMO | -6.17                                     | -6.26 | -6.27 | -6.14 | -6.23 | -6.25 |
|                         | LUMO | -2.20                                     | -2.25 | -2.25 | -2.09 | -2.12 | -2.11 |
|                         | 1/R  | 3.29                                      | 3.26  | 3.27  | 2.56  | 2.46  | 2.46  |
|                         | Voc  | 0.68                                      | 0.75  | 0.75  | 1.49  | 1.65  | 1.68  |
| Experiment <sup>1</sup> | Voc  | 1.00 (F-BsubPC/C60), 1.06 (Cl-BsubPC/C60) |       |       |       |       |       |

Table S8. The experimental Voc results from other papers.

| Experimental Results                                                                                        |            |
|-------------------------------------------------------------------------------------------------------------|------------|
| Device Composition                                                                                          | Voc (V)    |
| ITO/MoO <sub>3</sub> (5nm)/Cl-BsubPC(13nm)/C60(32nm)/BCP(7nm)/Ag <sup>2</sup>                               | 1.0        |
| ITO/MoO <sub>3</sub> (15 nm)/ Cl-BsubPC (10 nm)/C60 (30 nm)/ BCP:C60/Al (120 nm). <sup>3</sup>              | 1.05±0.04  |
| ITO/MoO <sub>3</sub> (10 nm)/Cl-BsubPC(9nm)/C60(30 nm)/Bathocuproine (BCP) (10 nm)/Ag (100 nm) <sup>4</sup> | 1.00±0.01  |
| ITO/MoO <sub>3</sub> (5nm)/F-BsubPC(13nm)/C60(36nm)/BCP(10nm)/Al(100 nm) <sup>1</sup>                       | 1.00±0.019 |
| ITO/MoO <sub>3</sub> (5nm)/Cl-BsubPC(13nm)/C60(36nm)/BCP(10nm)/Al(100 nm) <sup>1</sup>                      | 1.06±0.002 |
| ITO/MoO <sub>x</sub> (5 nm)/Cl-BsubPC (15 nm)/C60 (40 nm)/BPhen (6 nm)/Al (100 nm) <sup>5</sup>             | 1.05±0.02  |

Table S9. The surface area of monomers and X-BsubPC/C60 configurations. Unit: Å<sup>2</sup>

| System            | Surface Area |
|-------------------|--------------|
| F-BsubPC          | 385.98       |
| Cl-BsubPC         | 399.78       |
| Br-BsubPC         | 405.20       |
| F-BsubPC/C60 (U)  | 653.09       |
| Cl-BsubPC/C60 (U) | 669.51       |
| Br-BsubPC/C60 (U) | 673.54       |
| F-BsubPC/C60 (B)  | 732.34       |
| Cl-BsubPC/C60 (B) | 736.68       |
| Br-BsubPC/C60 (B) | 737.64       |

Table S10. Absorption  $\pi \rightarrow \pi^*$  excited state energy and oscillator strength of monomers and X-BsubPC/C60 bi-molecular systems with three LRC density functionals. Unit: nm ( $\lambda_{ave}$ ), eV (Energy)

|                  | System    | Excited State | Strength | Energy (eV) | Wavelength (nm) |
|------------------|-----------|---------------|----------|-------------|-----------------|
| $\omega$ B97XD   | F-BsubPC  | 1             | 0.3527   | 2.56        | 484.43          |
|                  |           | 2             | 0.3527   | 2.56        | 484.39          |
|                  |           | Average       | 0.7054   | 2.56        | 484.41          |
|                  | Cl-BsubPC | 1             | 0.3421   | 2.54        | 488.15          |
|                  |           | 2             | 0.3421   | 2.54        | 488.06          |
|                  |           | Average       | 0.6842   | 2.54        | 488.11          |
|                  | Br-BsubPC | 1             | 0.3364   | 2.54        | 488.84          |
|                  |           | 2             | 0.3364   | 2.54        | 488.78          |
|                  |           | Average       | 0.6728   | 2.54        | 488.81          |
| LC- $\omega$ PBE | F-BsubPC  | 1             | 0.3595   | 2.49        | 497.68          |
|                  |           | 2             | 0.3595   | 2.49        | 497.61          |
|                  |           | Average       | 0.719    | 2.49        | 497.65          |
|                  | Cl-BsubPC | 1             | 0.3491   | 2.47        | 501.96          |
|                  |           | 2             | 0.3491   | 2.47        | 501.85          |
|                  |           | Average       | 0.6982   | 2.47        | 501.91          |
|                  | Br-BsubPC | 1             | 0.3436   | 2.47        | 502.71          |
|                  |           | 2             | 0.3436   | 2.47        | 502.65          |
|                  |           | Average       | 0.6872   | 2.47        | 502.68          |
| CAM-B3LYP        | F-BsubPC  | 1             | 0.3521   | 2.56        | 483.41          |
|                  |           | 2             | 0.3521   | 2.56        | 483.36          |
|                  |           | Average       | 0.7042   | 2.56        | 483.39          |
|                  | Cl-BsubPC | 1             | 0.3415   | 2.55        | 487.06          |
|                  |           | 2             | 0.3415   | 2.55        | 486.97          |
|                  |           | Average       | 0.6830   | 2.55        | 487.02          |
|                  | Br-BsubPC | 1             | 0.3364   | 2.54        | 488.84          |
|                  |           | 2             | 0.3364   | 2.54        | 488.78          |
|                  |           | Average       | 0.6728   | 2.54        | 488.81          |

|                  |                  |                 |         |        |        |        |
|------------------|------------------|-----------------|---------|--------|--------|--------|
| $\omega$ B97XD   | F-BsubPC/C60(U)  | 1               | 0.2589  | 2.54   | 488.10 |        |
|                  |                  | 2               | 0.2621  | 2.54   | 487.70 |        |
|                  |                  | Average         | 0.521   | 2.54   | 487.90 |        |
|                  | F-BsubPC/C60(B)  | 1               | 0.3942  | 2.50   | 496.40 |        |
|                  |                  | 2               | 0.2721  | 2.54   | 489.00 |        |
|                  |                  | Average         | 0.6663  | 2.52   | 493.38 |        |
|                  | Cl-BsubPC/C60(U) | 1               | 0.2085  | 2.48   | 500.40 |        |
|                  |                  | 2               | 0.2092  | 2.49   | 498.10 |        |
|                  |                  | Average         | 0.4177  | 2.49   | 499.25 |        |
|                  | Cl-BsubPC/C60(B) | 1               | 0.4271  | 2.49   | 498.20 |        |
|                  |                  | 2               | 0.2617  | 2.52   | 491.40 |        |
|                  |                  | Average         | 0.6888  | 2.50   | 495.62 |        |
|                  | Br-BsubPC/C60(U) | 1               | 0.2019  | 2.47   | 501.80 |        |
|                  |                  | 2               | 0.2107  | 2.49   | 498.20 |        |
|                  |                  | Average         | 0.4126  | 2.48   | 499.96 |        |
|                  | Br-BsubPC/C60(B) | 1               | 0.4123  | 2.49   | 498.90 |        |
|                  |                  | 2               | 0.2584  | 2.52   | 492.10 |        |
|                  |                  | Average         | 0.6707  | 2.50   | 496.28 |        |
|                  | LC- $\omega$ PBE | F-BsubPC/C60(U) | 1       | 0.2304 | 2.43   | 509.50 |
|                  |                  |                 | 2       | 0.2344 | 2.45   | 506.00 |
|                  |                  |                 | Average | 0.4648 | 2.44   | 507.73 |
|                  |                  | F-BsubPC/C60(B) | 1       | 0.4074 | 2.45   | 507.00 |
|                  |                  |                 | 2       | 0.2827 | 2.47   | 501.10 |
|                  |                  |                 | Average | 0.6901 | 2.46   | 504.58 |
| Cl-BsubPC/C60(U) |                  | 1               | 0.2251  | 2.41   | 513.60 |        |
|                  |                  | 2               | 0.2269  | 2.43   | 510.50 |        |
|                  |                  | Average         | 0.452   | 2.42   | 512.04 |        |
| Cl-BsubPC/C60(B) |                  | 1               | 0.4311  | 2.43   | 510.60 |        |
|                  |                  | 2               | 0.2719  | 2.46   | 504.20 |        |
|                  |                  | Average         | 0.703   | 2.44   | 508.12 |        |
| Br-BsubPC/C60(U) |                  | 1               | 0.2205  | 2.41   | 514.40 |        |
|                  |                  | 2               | 0.2238  | 2.43   | 511.30 |        |
|                  |                  | Average         | 0.4443  | 2.42   | 512.84 |        |
| Br-BsubPC/C60(B) |                  | 1               | 0.4166  | 2.42   | 511.40 |        |
|                  |                  | 2               | 0.2684  | 2.46   | 505.00 |        |
|                  |                  | Average         | 0.685   | 2.44   | 508.89 |        |
| CAM-B3LYP        |                  | F-BsubPC/C60(U) | 1       | 0.0604 | 2.45   | 506.11 |
|                  |                  |                 | 2       | 0.0681 | 2.48   | 500.00 |
|                  |                  |                 | 3       | 0.1643 | 2.52   | 491.40 |
|                  |                  |                 | 4       | 0.0291 | 2.53   | 489.20 |
|                  |                  |                 | 5       | 0.0089 | 2.54   | 487.30 |
|                  |                  |                 | 6       | 0.0579 | 2.55   | 487.10 |

|                  |         |        |      |        |
|------------------|---------|--------|------|--------|
|                  | 7       | 0.0566 | 2.56 | 484.60 |
|                  | Average | 0.4453 | 2.51 | 493.06 |
| F-BsubPC/C60(B)  | 1       | 0.3436 | 2.48 | 500.10 |
|                  | 2       | 0.0768 | 2.52 | 492.90 |
|                  | 3       | 0.1398 | 2.54 | 487.80 |
|                  | 4       | 0.0589 | 2.55 | 486.80 |
|                  | 5       | 0.0212 | 2.55 | 486.00 |
|                  | Average | 0.6403 | 2.51 | 494.86 |
| Cl-BsubPC/C60(U) | 1       | 0.1367 | 2.46 | 503.30 |
|                  | 2       | 0.1668 | 2.48 | 500.30 |
|                  | 3       | 0.0231 | 2.54 | 488.90 |
|                  | 4       | 0.011  | 2.54 | 487.50 |
|                  | 5       | 0.0193 | 2.55 | 486.60 |
|                  | 6       | 0.0163 | 2.55 | 485.30 |
|                  | Average | 0.3732 | 2.48 | 498.95 |
| Cl-BsubPC/C60(B) | 1       | 0.4154 | 2.48 | 499.70 |
|                  | 2       | 0.1772 | 2.52 | 491.90 |
|                  | 3       | 0.0722 | 2.54 | 489.00 |
|                  | 4       | 0.0092 | 2.55 | 486.50 |
|                  | 5       | 0.0042 | 2.55 | 485.70 |
|                  | Average | 0.6782 | 2.50 | 496.26 |
| Br-BsubPC/C60(U) | 1       | 0.153  | 2.46 | 504.20 |
|                  | 2       | 0.1727 | 2.48 | 499.00 |
|                  | 3       | 0.0093 | 2.53 | 489.40 |
|                  | 4       | 0.0136 | 2.54 | 487.50 |
|                  | 5       | 0.0032 | 2.55 | 486.30 |
|                  | Average | 0.3518 | 2.48 | 500.45 |
| Br-BsubPC/C60(B) | 1       | 0.4018 | 2.48 | 500.00 |
|                  | 2       | 0.1772 | 2.52 | 492.60 |
|                  | 3       | 0.0712 | 2.53 | 489.70 |
|                  | 4       | 0.0076 | 2.55 | 486.40 |
|                  | 5       | 0.0022 | 2.55 | 485.80 |
|                  | Average | 0.66   | 2.50 | 496.70 |

Table S11. The ground to excited state transition electric dipole moment of X-BsubPC/C60 configurations (X=F, Cl and Br) with different functionals.

|       | State | $\omega$ B97XD | LC- $\omega$ PBE | CAM-B3LYP |
|-------|-------|----------------|------------------|-----------|
| F(U)  | G→1   | 4.1602         | 3.6510           | 1.0051    |
|       | G→2   | 4.2084         | 3.9041           | 1.1207    |
| Cl(U) | G→1   | 3.4354         | 3.8055           | 2.2650    |
|       | G→2   | 3.4304         | 3.8131           | 2.7471    |
| Br(U) | G→1   | 3.3354         | 3.7347           | 2.5396    |
|       | G→2   | 3.4555         | 3.7668           | 2.8378    |
| F(B)  | G→1   | 6.4423         | 6.7999           | 5.6571    |
|       | G→2   | 4.9809         | 4.6640           | 1.2468    |
| Cl(B) | G→1   | 7.0045         | 7.2460           | 6.8338    |
|       | G→2   | 4.2337         | 4.5129           | 2.8695    |
| Br(B) | G→1   | 6.7718         | 7.0141           | 6.6140    |
|       | G→2   | 4.1866         | 4.4618           | 2.8734    |

Table S12. The average wavelength of both X-BsubPC/C60 (X=F, Cl, Br) U and B configurations. Unit: nm.

|                  | $\omega$ B97XD | LC- $\omega$ PBE | CAM-B3LYP |
|------------------|----------------|------------------|-----------|
| F-BsubPC/C60(U)  | 487.9          | 507.7            | 493.1     |
| F-BsubPC/C60(B)  | 493.4          | 504.6            | 494.9     |
| Cl-BsubPC/C60(U) | 499.3          | 512.0            | 499.0     |
| Cl-BsubPC/C60(B) | 495.6          | 508.1            | 496.3     |
| Br-BsubPC/C60(U) | 500.0          | 512.8            | 500.5     |
| Br-BsubPC/C60(B) | 496.3          | 508.9            | 496.7     |

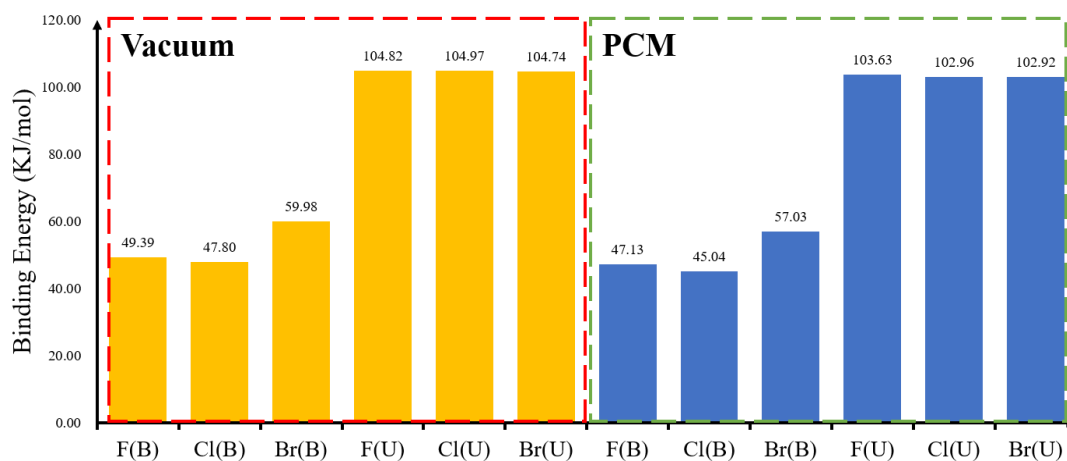

Figure S1. The binding energies of X-BsubPC/C60 configurations in gas phase and condensed phase, U=Umbrella, B=Bed.

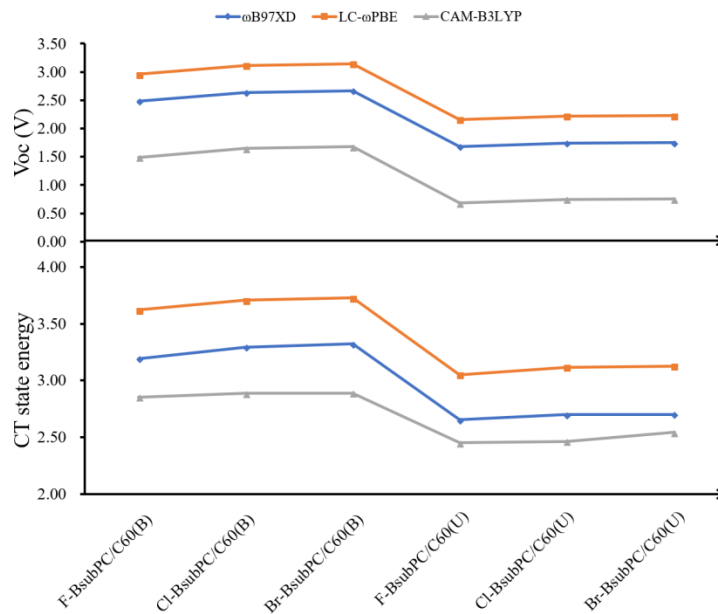

Figure S2. The calculated Voc and CT energies of X-BsubPC/C60 configurations in gas phase.

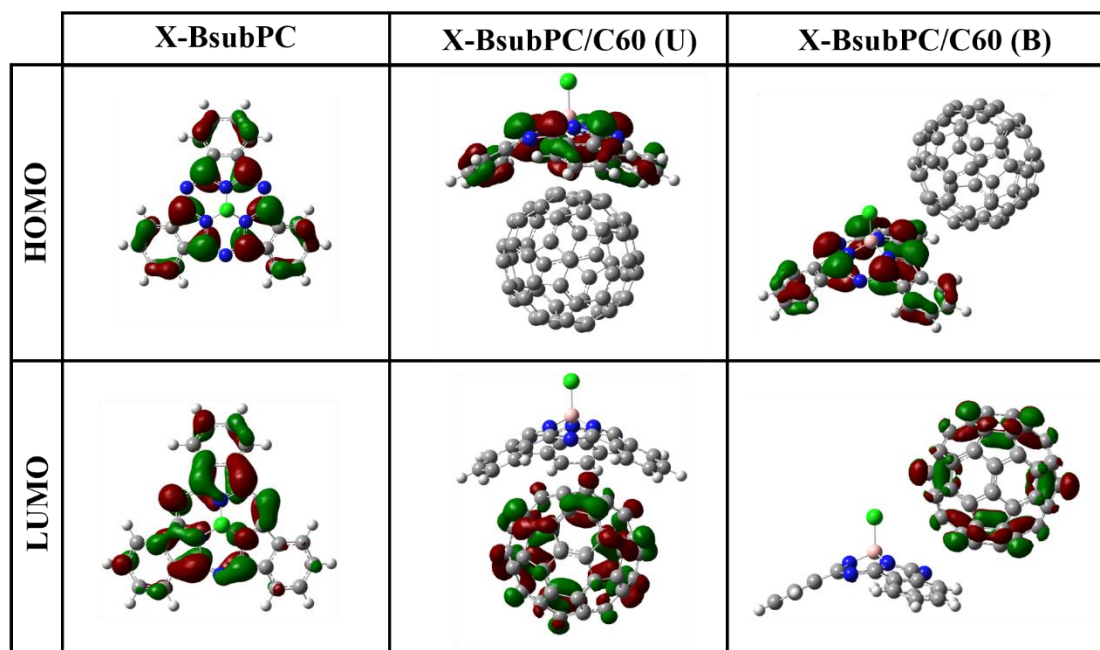

Figure S3. Schematic representations of frontier molecular orbitals of monomer and X-BsubPC/C60 bi-molecular systems (X=F, Cl, Br). (iso-surface value=0.03 a.u, density=0.0004).



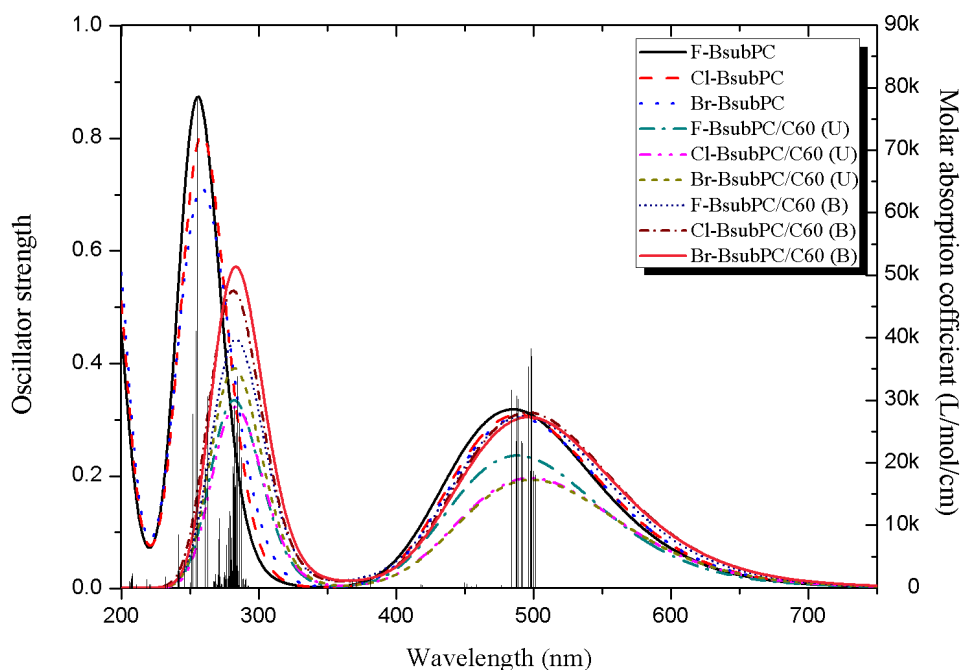

Figure S4. The absorption spectra of X-BsubPC monomers and X-BsubPC/C60 bi-molecular systems obtained with  $\omega$ B97XD functional.

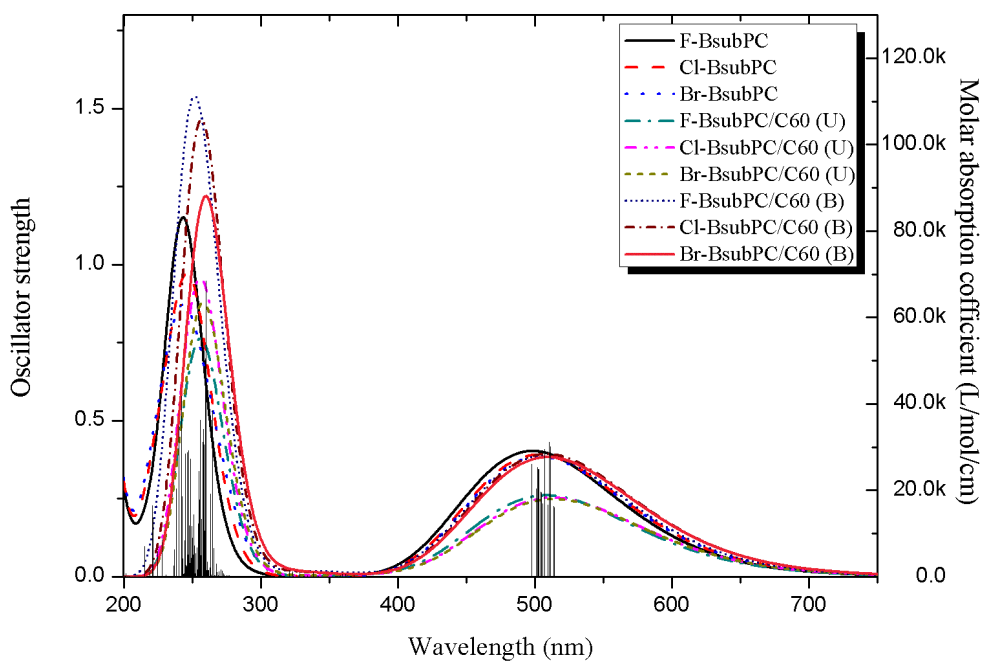

Figure S5. The absorption spectra of X-BsubPC monomers and X-BsubPC/C60 bi-molecular systems obtained with LC- $\omega$ PBE functional.

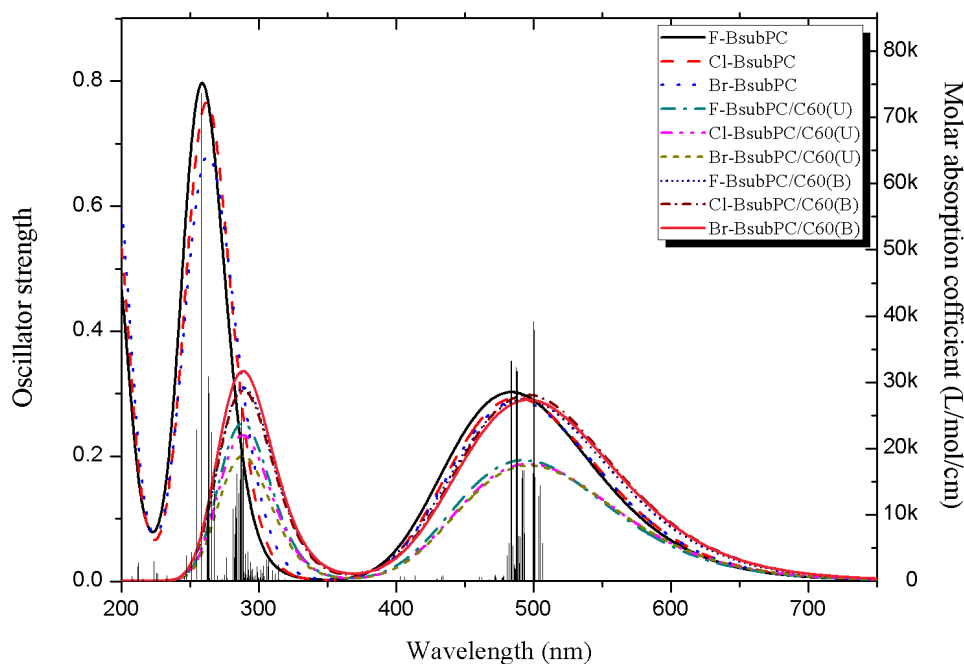

Figure S6. The absorption spectra of X-BsubPC monomers and X-BsubPC/C60 bi-molecular systems obtained with CAM-B3LYP functional.

## References

1. S. E. Morris, D. Bilby, M. E. Sykes, H. Hashemi, M. J. Waters, J. Kieffer, J. Kim and M. Shtein, *Org. Electron.*, 2014, **15**, 3660-3665.
2. M. A. Stevens and A. C. Arango, *Org. Electron.*, 2016, **37**, 80-84.
3. S. W. Liu, C. C. Lee, W. C. Su, C. H. Yuan, Y. S. Shu, W. C. Chang, J. Y. Guo, C. F. Chiu, Y. Z. Li and T. H. Su, *ACS Appl. Mat. Interfaces*, 2015, **7**, 9262.
4. P. H. Huang, Y. H. Wang, J. C. Ke and C. J. Huang, *Materials*, 2016, **9**, 667.
5. F. Jin, Z. Su, B. Chu, P. Cheng, J. Wang, H. Zhao, Y. Gao, X. Yan and W. Li, *Scientific Reports*, 2016, **6**, 26262.
